# Supplementary material for: From Corridor to Network Macroscopic Fundamental Diagrams: A Semi-Analytical Approximation Approach
Source: Atypon-hosted journal article supplement (doi:10.1287/trsc.2022.0402), 2023-08-01
Supplement: trsc.2022.0402.sm1.pdf [file trsc.2022.0402.sm1.pdf]

# Appendices to ‘From Corridor to Network Macroscopic Fundamental Diagrams: A Semi-analytical Approximation Approach’

Gabriel Tilg<sup>1</sup>, Lukas Ambühl<sup>2</sup>, Sérgio F. A. Batista<sup>3</sup>,  
Mónica Menéndez<sup>3</sup>, Ludovic Leclercq<sup>4</sup>, and Fritz Busch<sup>1</sup>

<sup>1</sup>Chair of Traffic Engineering and Control, Department of Civil,  
Geo and Environmental Engineering, Technical University of  
Munich, Germany

<sup>2</sup>Traffic Engineering Group, Institute for Transport Planning and  
Systems, ETH Zurich, Switzerland

<sup>3</sup>Division of Engineering, New York University Abu Dhabi, United  
Arab Emirates

<sup>4</sup>Univ. Gustave Eiffel, ENTPE, LICIT, F-69518, Lyon, France

## 1 Nomenclature.

<sup>2</sup> Table 1 summarizes the nomenclature used in this paper. They are categorized  
<sup>3</sup> into Greek letters, as well as lower-case and capital Latin letters.

Table 1: Nomenclature

| Variable         | Unit     | Description                                                          |
|------------------|----------|----------------------------------------------------------------------|
| $\alpha \in A$   | [-]      | Turning ratio in set of turning ratios                               |
| $\tilde{\alpha}$ | [-]      | Factor impacting the queue growth due to turning flows               |
| $\beta$          | [-]      | Time-dependent capacity constraint representing traffic signals      |
| $\Delta t$       | [h]      | Numerical step length in the temporal dimension                      |
| $\Delta x$       | [km]     | Numerical step length in the spatial dimension                       |
| $\Delta N$       | [veh]    | Cycle-based difference in supply and demand                          |
| $\delta N$       | [veh]    | Cycle-based difference in supply and demand at a signal phase change |
| $\kappa$         | [veh/km] | Density                                                              |
| $\kappa_{max}$   | [veh/km] | Jam density                                                          |

Table 1: Nomenclature (continued)

|                                     |          |                                                                                  |
|-------------------------------------|----------|----------------------------------------------------------------------------------|
| $\kappa_{opt}$                      | [veh/km] | Optimal density                                                                  |
| $\kappa'$                           | [veh/km] | Transformed density                                                              |
| $\theta$                            | [-]      | Ratio of the free-flow speed $u$ and the backward wave speed $w$                 |
| $\tau$                              | [s]      | Time between beginning of active phase and $t_e$                                 |
| $\sigma$                            | [h]      | Duration of spillback impact                                                     |
| $\lambda$                           | [-]      | Inflow factor at origin links                                                    |
| $\gamma$                            | [-]      | Factor for approximating congestion propagation                                  |
| $c$                                 | [s]      | Cycle length                                                                     |
| $c_f$                               | [-]      | Cycle when the final vehicle reaches the intersection                            |
| $g$                                 | [s]      | Duration of a green phase                                                        |
| $i, j$                              | [-]      | Indices for corridors                                                            |
| $k$                                 | [-]      | Index for intersections and links                                                |
| $l$                                 | [km]     | Link length                                                                      |
| $m$                                 | [-]      | Index for moving observer                                                        |
| $o$                                 | [s]      | Offset                                                                           |
| $p$                                 | [-]      | Valid path                                                                       |
| $q$                                 | [veh/h]  | Flow                                                                             |
| $q_f$                               | [veh/h]  | Flow during the cycle $c_f$                                                      |
| $q_{max}$                           | [veh/h]  | Link capacity                                                                    |
| $\tilde{q}$                         | [veh/h]  | Maximum average flow during green phase                                          |
| $\tilde{q}_d$                       | [veh/h]  | Flow $\tilde{q}$ constrained by demand only                                      |
| $\tilde{q}_s$                       | [veh/h]  | Flow $\tilde{q}$ constrained by supply only                                      |
| $\tilde{q}_{k,s}^{j \rightarrow i}$ | [veh/h]  | Flow $\tilde{q}$ on $C^i$ constrained by spillbacks from $C^j$                   |
| $r$                                 | [s]      | Duration of a red phase                                                          |
| $t$                                 | [h]      | Temporal dimension                                                               |
| $t_b$                               | [h]      | Beginning of spillback impact                                                    |
| $t_e$                               | [h]      | End of spillback impact                                                          |
| $t_f$                               | [h]      | Time instant when the final vehicle leaves the intersection.                     |
| $t_{k,dq}$                          | [h]      | Time instant when the queue starts to grow at the downstream end of the link $k$ |
| $t_{k,uq}$                          | [h]      | Time instant when the queue reaches the upstream end of the link $k$             |
| $u$                                 | [km/h]   | Free-flow speed                                                                  |
| $v$                                 | [km/h]   | Speed                                                                            |
| $w$                                 | [km/h]   | Backward wave speed                                                              |
| $x$                                 | [km]     | Spatial dimension                                                                |
| $z_p$                               | [veh]    | Cost of path $p$                                                                 |
| $B$                                 | [-]      | Curve in time and space along which the boundary data $N_B$ is given             |
| $C \in \mathcal{C}$                 | [-]      | Corridor in set of corridors                                                     |

Table 1: Nomenclature (continued)

|                     |          |                                                                   |
|---------------------|----------|-------------------------------------------------------------------|
| $\mathcal{G}$       | [-]      | Hypernetwork                                                      |
| $I \in \mathcal{I}$ | [-]      | Intersection in set of intersections                              |
| $K$                 | [veh/km] | Network-wide average density                                      |
| $K_k$               | [veh/km] | Maximum density on the link $k$ .                                 |
| $K_{max}$           | [veh/km] | Network-wide jam density                                          |
| $L \in \mathcal{L}$ | [-]      | Link in set of links                                              |
| $N$                 | [veh]    | Cumulative count                                                  |
| $N_c$               | [veh]    | Maximum number of vehicles passing an intersection during a cycle |
| $N_e$               | [veh]    | Cumulative count at the end of a green phase                      |
| $N_s$               | [veh]    | Cumulative count at the start of a green phase                    |
| $\mathcal{N}$       | [-]      | Physical road network                                             |
| $P(x, t)$           | [-]      | Generic point in time and space                                   |
| $\mathcal{P}$       | [-]      | Set of valid paths from $B$ to $P$                                |
| $Q$                 | [veh/h]  | Network-wide average flow                                         |
| $R(v_m)$            | [veh]    | Average maximum passing flow for a moving observer $m$            |
| $Z_m$               | [veh]    | Sum of all costs along the path of a moving observer $m$          |

## 2 Review of the variational theory and the method of cuts

This section briefly describes the basics of VT and MC as our framework builds upon these methods. Moreover, we highlight the deficiencies of current MC-based approaches to estimate the realized network MFD.

### 2.1 Variational theory

Daganzo (2005a,b) formulated the VT framework to solve complex and heterogeneous KWT problems. This framework determines the cumulative number of vehicles  $N(x, t)$  that have passed the location  $x$  of a road by time  $t$ , for given boundary conditions. It requires the definition of fundamental diagram(s) (FD), i.e.,  $q(\kappa)$ , network topology including signal control settings, bottlenecks (moving or stationary), as well as boundary data  $N_B$  along a curve  $B$ . The density is denoted by  $\kappa$ . Recall that the FD is characterized by the free-flow speed  $u$ , the backward wave speed  $w$ , and the link jam density  $\kappa_{max}$ . The capacity  $q_{max}$  is derived at the optimal density  $\kappa_{opt}$ , i.e.,  $q_{max} = q(\kappa_{opt})$ .

To determine the cumulative count  $N$  at a point  $P(x, t)$ , we need to find the valid path  $p \in \mathcal{P}$  starting at the boundary  $B$ , ending at  $P$ , and leading to the minimal increase of  $N$  over  $p$ . A path  $p$  is denoted as valid if its slope lies between the extremal speeds  $v \in [w, u]$  where  $w$  has a negative value. Based on

23 the slope of the path, costs  $z_p$  are defined. These costs refer to the maximum  
 24 number of vehicles that can pass a moving observer traveling along the path  $p$ .  
 25 Given the set of paths  $\mathcal{P}$ , as well as the associated costs  $z_p$  and boundary values  
 26  $N_{B,p}$  associated with each path  $p$ , the cumulative count  $N_P$  can be found by a  
 27 shortest path search as follows:

$$N_P = \min_{p \in \mathcal{P}} \{N_{B,p} + z_p\}. \quad (1)$$

28 By defining a numerical grid representing the solution space, we can find the  
 29 cumulative count  $N$  based on eq.(1). Several possibilities for building problem-  
 30 specific numerical grids exist (Daganzo and Menendez 2005). One option for  
 31 signalized corridors is to define the temporal and spatial distances as  $\Delta t$  and  
 32  $\Delta x$ , respectively. Then, the points on this grid are connected with horizontal  
 33 and slanted edges which slopes correspond to  $v \in \{w, 0, u\}$ . The cumulative  
 34 number  $N(x, t)$  where  $(x, t)$  are points on the numerical grid, can then be found  
 35 as follows:

$$\begin{aligned} N(x, t) = \min & (N(x - \Delta x, t - \Delta t), \\ & N(x + \Delta x, t - \theta \Delta t) + \Delta x \kappa_{max}, \\ & N(x, t - \Delta t) + \beta). \end{aligned} \quad (2)$$

36 where  $\theta = |\frac{u}{w}|$  is the absolute value of the ratio of the free-flow and the backward  
 37 wave speed. If  $\theta$  is an integer, the equation represents a lopsided numerical  
 38 grid which facilitates the application of eq.(2), as nodes in the graph align  
 39 horizontally. In cases where  $\theta$  is not an integer, a shear transformation (e.g.,  
 40 Laval and Chilukuri 2016) can be applied to transform a triangular FD such  
 41 that  $\theta$  becomes an integer. Otherwise, although possible, the construction of the  
 42 network becomes more cumbersome. The parameter  $\beta$  accounts for any capacity  
 43 constraints such as traffic signals. More specifically, if  $\beta = 0$  the capacity equals  
 44 zero, which can for example, represent the red phase of a traffic signal. Green  
 45 phases can be modelled by setting  $\beta = q_{max}$ . For more details, please refer to  
 46 Daganzo and Menendez (2005), Leclercq and Paipuri (2019), Tilg et al. (2021).

## 47 2.2 Original method of cuts

48 Based on the concept of VT, Daganzo and Geroliminis (2008) introduced the  
 49 MC to analytically approximate the idealized MFD for regular corridors with  
 50 uniform link FD, block lengths, and signal control characteristics across all inter-  
 51 sections. Leclercq and Geroliminis (2013) further extended the methodology to  
 52 consider heterogeneous topologies, i.e., corridors with varying block lengths and  
 53 signal settings. Laval and Castrillón (2015) integrated the MC into a stochastic  
 54 context to be able to apply it to long corridors with varying parameters. Da-  
 55 ganzo and Lehe (2016) formulated a linear program based on the MC to further  
 56 simplify the estimation of the idealized MFD for corridors. Dakic et al. (2020)  
 57 proposed a stochastic shortest path algorithm to model bi-modal interactions  
 58 and their stochasticity along the corridor. A fundamental assumption of the

59 MC and its extensions is the existence of stationary traffic states driven by a  
60 constant inflow. In the following, we provide a brief summary of the current  
61 state of the art, and how to apply the MC for a simple example. We refer inter-  
62 ested readers to the original papers for further details. Note that these methods  
63 estimate the idealized MFD.

64 MC's required parameters are the number of links in the corridor, the number  
65 of lanes, the length of each link, the signal parameters, and the FD. Similar to  
66 VT, a numerical grid is defined based on these parameters, i.e., the so-called  
67 global variational graph or *hyperlink*. However, the graph is not discretized with  
68  $\Delta t$  and  $\Delta x$ , but consists of horizontal edges only at the location of intersections  
69  $I_k$  referring to both green and red phases,  $g$  and  $r$ . The index  $k$  describes a  
70 link and its downstream intersection along a specific corridor. The horizontal  
71 edges are connected with slanted edges, which slopes are either equal to the  
72 free-flow speed  $u$ , or the backward wave speed  $w$ . The slanted edges start  
73 at the bottleneck termini and end where they reach the next horizontal edge  
74 representing a red phase. As in VT, costs are associated with each edge and  
75 relate to the maximum number of vehicles that would pass a moving observer  
76 traveling along such an edge. Figure 1a shows an example for a hyperlink  
77 corresponding to a corridor with two intersections  $I_k$  and  $I_{k+1}$ . The horizontal  
78 edges are defined by green and red phases  $g_k, g_{k+1}, r_k$ , and  $r_{k+1}$ .

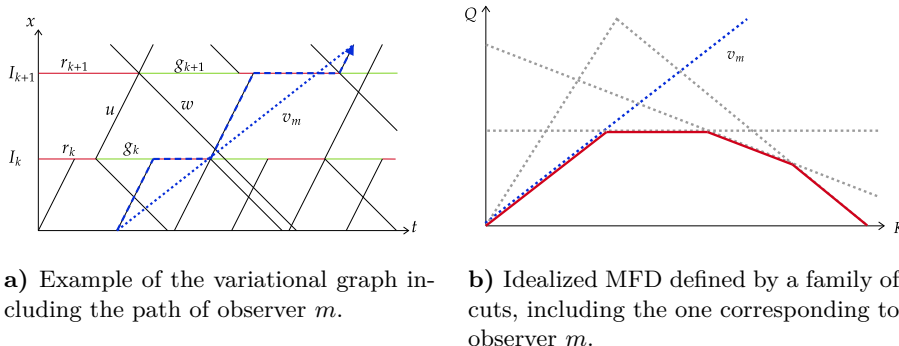

Figure 1: Variational graph including a moving observer's path and its translation to the idealized MFD.

79 Based on the hyperlink, the idealized MFD for the given corridor can be  
80 estimated as follows. The flow  $q_P$  at a certain point  $P(x, t_0)$  approaches a  
81 location-independent limit for the case of a steady state given a certain initial  
82 density. Daganzo and Geroliminis (2008) described this flow as  $q = N_P/t, t =$   
83  $t_0 \rightarrow \infty$ . The upper bound for the flow in the corridor can be derived as follows:

$$Q(K) = \inf_{v_m} \{Kv_m + R(v_m)\}, \quad (3)$$

84 where  $Q(K)$  is the average flow,  $K$  is the average density in the corridor, and  $v_m$

85 is the average speed of a moving observer  $m$ .  $R(v_m) = Z_m/t, t = t_0 \rightarrow \infty$  is the  
 86 maximum flow that passes, on average, the moving observer  $m$ . The parameter  
 87  $Z_m$  is the sum of all costs along the path of moving observer  $m$ . This equation  
 88 corresponds to a straight curve in the  $(Q, K)$  - plane and is referred to as a *cut*.

89 Figure 1 illustrates the procedure for a single cut as an example. The blue  
 90 dashed line corresponds to the path of moving observer  $m$ . The costs  $Z_m$  are zero  
 91 since only edges representing red phases and slanted edges with  $v = u$  are part of  
 92 the moving observer's route. The corresponding costs  $z$  of these edges are zero,  
 93 as no vehicles can pass the moving observer traveling along them. The average  
 94 speed  $v_m$  is displayed as a dotted blue curve. In Figure 1b the corresponding  
 95 cut is shown as a blue dotted line again. Repeating this procedure, and thus  
 96 evaluating eq.(3) for different  $K$  and moving observers with different average  
 97 speeds  $v_m$  leads to a family of cuts, shown as the grey dotted lines in Figure 1b.  
 98 These cuts constrain the average flow  $Q$  along with the evaluated range of  $K$ .  
 99 The lower envelope of all cuts is the idealized corridor MFD,  $Q(K)$ .

### 100 3 Discussion of assumptions and limitations

- 101 • **Multimodality:** The focus lies on unimodal networks. That is, we do  
 102 not consider any modes apart from private vehicles. Nevertheless, there  
 103 are multimodal extensions for the original MC which can potentially be  
 104 integrated into our framework. They follow the idea of representing the  
 105 effects of other modes on traffic states as moving or stationary bottlenecks.  
 106 We consider this, however, out of scope and leave it for future work.
- 107 • **Existence of stationary traffic states:** We assume that stationary  
 108 states exist for any spatial demand pattern if the temporal change is slow.  
 109 Note that this is an assumption inherited from the original MC and further  
 110 applies to the general notion of the MFD (Daganzo 2007). Furthermore,  
 111 we assume that such stationary states can be reached. For a given spatial  
 112 demand pattern, which is represented by turning ratios at intersections  
 113 in our framework, we conjecture that stationary states exist for any such  
 114 pattern if the temporal demand profile is constant. Both traffic states and  
 115 shock waves travel with finite speeds within a network with finite length.  
 116 Thus, shock waves reach the boundaries of the network within finite time.  
 117 Once all shock waves arrive at the boundary, a stationary state is reached  
 118 at the network level. However, we do not explicitly specify an initial state  
 119 in the network. Instead, we solve for boundary conditions which result in  
 120 a maximum network-wide average flow. Thus, we implicitly assume the  
 121 existence of an initial state which leads to the capacity state of the network.  
 122 Note that the existence of stationary states is a common assumption in  
 123 related literature (e.g., Leblanc 1975).
- 124 • **Uniqueness of stationary traffic states:** The uniqueness of station-  
 125 ary traffic states might not necessarily be given. On the contrary, the

126 results from theoretical studies for simple network topologies (e.g., two-  
127 ring networks) indicate that congested traffic states might not be unique  
128 even when being stationary, but rather depend on the initial distribution  
129 of vehicles (Jin, Gan, and Gayah 2013). However, note that we only con-  
130 sider two different initial states to derive the MFD. The first regards an  
131 empty network, and the second to the network at capacity. Thus, the  
132 initial states are constant. This and the fact that our node models are  
133 deterministic indicate that the resulting MFDs from our framework are  
134 unique. Nevertheless, such considerations are only valid for a slow-varying  
135 demand profile. More specifically, if the demand changes faster than the  
136 system’s response can be (e.g., due to a larger network), then no station-  
137 ary states will occur (e.g., Leclercq and Paipuri 2019). Daganzo (2007)  
138 introduced the system’s relaxation time and further suggested approxi-  
139 mating it by the travel time across the related region. He further stated  
140 that a change in demand should occur slowly compared to the system’s  
141 relaxation time.

142 • **Conflicting streams:** We only consider signalized intersections with-  
143 out modeling conflicting streams explicitly. However, conflicting traffic  
144 streams can be approximated by reducing the average capacity of cor-  
145 responding intersection approaches accordingly, e.g., based on headway  
146 distributions (Herz, Schlichter, and Siegener 1976). Related to that, other  
147 intersection types such as 4-way stops can be included if capacity estimates  
148 for the corresponding intersection approaches exist.

149 • **Queueing discipline:** We assume that vehicles follow a FIFO discipline  
150 on all links and at diverges (Newell 1993). Turning lanes can be introduced  
151 by splitting a link, and defining the turning ratios at the downstream end  
152 of each lane accordingly. For example, the turning ratio at the down-  
153 stream end of a right-turning lane would be 1, while it would be 0 at the  
154 downstream end of the straight-going lane.

155 • **Intersection connectivity:** For the sake of simplicity, our framework  
156 only applies to cases where vehicles at intersections can either remain on  
157 the main corridor or change to a single adjacent corridor. Thus, only  
158 either left, right, or u-turns, but not multiple turning options can be mode-  
159 led for a given link. The possibility of describing turning flows between  
160 more than a pair of corridors is left for future work. While the general  
161 framework is able to account for multiple turning options since the basic  
162 functionality requires no substantial modification, it would at least neces-  
163 sitate the specification of turning ratios for each option and the coupling  
164 of more than two corridors at intersections.

165 • **Turning ratios:** While we allow turning ratios to vary between intersec-  
166 tions, we assume them to be constant across time. This results from our  
167 focus on deriving stationary states which cannot reasonably be achieved  
168 with time-dependent demand profiles.

- 169 • **Network-wide jam density:** When we restrict capacities at destination  
170 links, the density  $K$  is influenced by the remaining network outflow and  
171 inflow. The strongest outflow restriction is represented by a simultane-  
172 ous closing of all destination links. If some links were not closed, vehicles  
173 could still leave the network. However, the queue growth throughout  
174 the network that results from the outflow restriction highly depends on  
175 the turning ratios at each intersection. A blocked intersection leads to  
176 zero flows at all downstream links independently of the respective queues.  
177 Thus, the link densities can be smaller than  $\kappa_{max}$ . The network inflow  
178 is determined by the maximum of the demand and the capacity of origin  
179 links. While the demand is independent of the outflow restriction, the  
180 capacity of origin links depends on whether queues have already reached  
181 these links. Due to traffic interdependencies in the network, queues can  
182 grow even though some destination links might not be restricted. In other  
183 words, a queue growing from one restricted destination link can finally  
184 block multiple origin links. Thus, for the case of a non-simultaneous out-  
185 flow restriction, we assume that net outflows out of the system are larger  
186 than in the case of a simultaneous outflow restriction. Therefore, we con-  
187 jecture that the maximum number of vehicles in the network, and thus  
188  $K_{max}$  considering spatial demand patterns, can be achieved in the latter  
189 case.
- 190 • **Density transformation:** To approximate the congested branch, we  
191 mirror those traffic states by changing the sign of  $\kappa'$  for each traffic state  
192  $(\kappa', q)$ . Re-transforming the original as well as the newly generated traffic  
193 states based on eq.(27) in Section 5.3.2 of the paper, and considering  $K_{max}$   
194 instead of the link jam density  $\kappa_{max}$  leads to a fully defined MFD including  
195 the congested branch. Hereby, the main assumption is that the symmetry  
196 still holds even though we utilize the reduced network jam density instead  
197 of the link jam density. This assumption is equivalent to assuming an  
198 increase of the average speed with which congestion spreads at the corridor  
199 level. Thus, also the average backward wave speed can be decreased (i.e.,  
200 the value becomes more negative). This seems to be reasonable given the  
201 following example. Consider a corridor with three links in a network. Let  
202 us assume the most downstream link becomes fully congested, but then  
203 queues from adjacent corridors block the upstream intersections such that  
204 the second link remains empty, and the queue continues to grow on the  
205 most upstream link. Eventually, only the most downstream and most  
206 upstream links are fully congested, while the middle link remains empty.  
207 Congestion spreads with the corresponding shock wave speed on the most  
208 downstream link, skips the middle link, and then spreads on the most  
209 upstream link. The total time to reach a stationary state divided by the  
210 corridor length can be interpreted as the speed with which congestion  
211 spreads for this specific corridor. This speed is higher than for the case  
212 without any network effects. This corresponds to the implicit assumption  
213 that the average speed with which congestion spreads is increased, when

214 we apply the shear transformation using the network jam density  $K_{max}$ .  
 215 Thus, we conjecture that assuming the symmetry to hold for  $K_{max}$  is  
 216 reasonable.

## 217 4 Network decomposition

218 The initialization of the problem (Step 0) defines a physical road network  $\mathcal{N}$   
 219 consisting of intersections  $I \in \mathcal{I}$  and links  $L \in \mathcal{L}$ . Moreover, it includes the  
 220 specification of signal control settings, i.e., red  $r$  and green times  $g$ , cycle lengths  
 221  $c$  and offsets  $o$ , as well as turning ratios  $\alpha \in A$  at each intersection  $I$ . All  
 222 information from  $\mathcal{N}$  including topological features, turning ratios  $\alpha$ , and control  
 223 settings for  $I \in \mathcal{I}$  have to be retained when the network is decomposed (Step 1).  
 224 Note that the turning ratios are an exogenous input. The two main requirements  
 225 for decomposing the network  $\mathcal{N}$  are:

- 226 1. The set  $\mathcal{C}$  includes all links  $L \in \mathcal{L}$ .
- 227 2. Each link  $L$  exists only once in  $\mathcal{C}$ , i.e., the corridors do not have any  
 228 overlapping segments.

229 For small toy networks, we can determine the set  $\mathcal{C}$  manually from  $\mathcal{N}$ . More  
 230 general, realistic networks can be decomposed according to the actual layout  
 231 of the roads. This includes arterials, avenues, and streets. Each road can be  
 232 represented as a corridor  $C$  and as such be incorporated in  $\mathcal{G}$ . This will always  
 233 satisfy both conditions mentioned above. Requirement 2 does not preclude the  
 234 potential existence of circular routes in the network (see Tilg et al. (2021) for  
 235 more details). Such interdependencies across links are essential to realistically  
 236 model the propagation of traffic congestion. Note that the set  $\mathcal{C}$  might affect  
 237 the MFD to a certain extent.

## 238 5 Derivation of $\tilde{\alpha}$ .

The maximum flow  $q_{max}$  can be written as  $q_{max} = u\kappa_{opt}$  and  $q_{max} = w(\kappa_{max} - \kappa_{opt})$ . From this follows that:

$$u = w \frac{\kappa_{max} - \kappa_{opt}}{\kappa_{opt}}. \quad (4)$$

Furthermore, from the fundamental diagram as depicted in Figure 2 we can write:

$$\alpha q_{max} = (\kappa_{max} - \alpha \kappa_{opt}) \tilde{\alpha} w. \quad (5)$$

Then, we can reformulate this equation to:

$$\tilde{\alpha} = \frac{\alpha q_{max}}{w(\kappa_{max} - \alpha \kappa_{opt})} \quad (6)$$

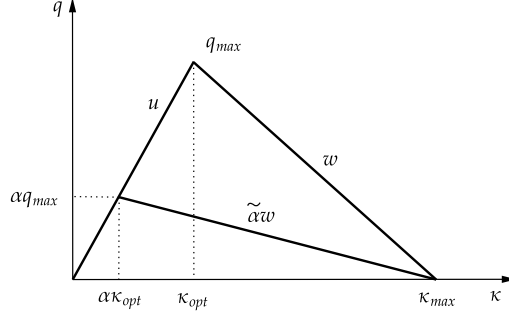

Figure 2: Illustration of  $\tilde{\alpha}$  in the FD.

By putting  $q_{max} = u\kappa_{opt}$ , dividing by  $\kappa_{opt}$ , and reformulating the denominator, and finally utilizing eq.(4), we get the following:

$$\begin{aligned}
\tilde{\alpha} &= \frac{\alpha q_{max}}{w(\kappa_{max} - \alpha\kappa_{opt})} \\
&= \frac{\alpha u \kappa_{opt}}{w(\kappa_{max} - \alpha\kappa_{opt})} \\
&= \frac{\alpha u}{\frac{w}{\kappa_{opt}}(\kappa_{max} - \alpha\kappa_{opt})} \\
&= \frac{\alpha u}{\frac{w}{\kappa_{opt}}(\kappa_{max} - \kappa_{opt} + (1 - \alpha)\kappa_{opt})} \\
&= \frac{\alpha u}{\frac{w}{\kappa_{opt}}(\kappa_{max} - \kappa_{opt}) + \frac{w}{\kappa_{opt}}(1 - \alpha)\kappa_{opt}} \\
&= \frac{\alpha u}{\frac{w}{\kappa_{opt}}(\kappa_{max} - \kappa_{opt}) + w(1 - \alpha)} \\
&= \frac{\alpha u}{u + w(1 - \alpha)}
\end{aligned} \tag{7}$$

239 This concludes the derivation of  $\tilde{\alpha}$  as used in the paper.

## 240 6 Sensitivity study

### 241 6.1 Impact of route selection

242 An assumption made in order to reduce modeling complexity and computational  
243 burden while approximating the network MFD refers to the set of routes based  
244 on which the free-flow branch is estimated. In the nMC, we propose to estimate  
245 the free-flow branch for each corridor  $C \in \mathcal{C}$  being aware that this is a simpli-  
246 fication. In order to study the implication of this simplification, we estimate  
247 the MFD based on the nVT approach for two different sets of routes in the

248 network in the following. First, we evaluate the MFD based on  $\mathcal{C}$ , which results  
 249 in 24 different routes. Second, we extract the shortest paths for all OD pairs in  
 250 the Sioux Falls network and define each path as a route for which the MFD is  
 251 estimated. In this case, the number of routes increases to a total of 576. Note  
 252 that the capacity branch is not affected by this assumption and the congested  
 253 branch equals the transformed free-flow one. Therefore, we only evaluate the  
 254 free-flow branch of the MFD for the two sets of routes and compare them below.

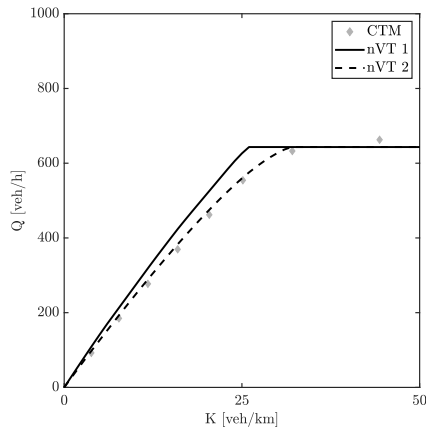

Figure 3: Comparison of the impact of route selection.

255 Figure 3 shows the free-flow branch of both MFDs. The solid black curve  
 256 labeled as ‘nVT 1’ represents the derived free-flow branch based on  $\mathcal{C}$ . The  
 257 dashed black curve ‘nVT 2’ illustrates the one which results from considering  
 258 the second set of routes. The figure indicates that indeed the estimation’s  
 259 accuracy is further increased by the latter approach as the curve is closer to the  
 260 ground truth MFD. However, the number of paths to be evaluated is 24 times  
 261 higher in our case study. This leads to a significant increase in computational  
 262 cost. In the end, the selection of routes for the MFD estimation is use-case  
 263 dependent and the choice represents a trade-off between computational burden  
 264 and estimation accuracy.

## 265 6.2 Impact of turning ratios

266 Here, we aim at evaluating our framework for the presented network with dif-  
 267 ferent turning ratio sets  $\mathcal{A}$ . More specifically, we first analyze the variability of  
 268 the resulting MFDs from the ground truth to validate that spatial demand pat-  
 269 terns indeed have an impact. Second, we compare the results from our proposed  
 270 framework to the state of the art and the ground truth to assess the quality of  
 271 our approach. Last, we pick a specific set  $\mathcal{A}$ , introduce small deviations, and  
 272 investigate the effects on the resulting MFDs based on our framework. This in-  
 273 dicates the robustness of our MFD estimation method against different spatial

274 demand patterns.

275 For the first analysis, we randomly select ten different reasonable sets  $\mathcal{A}$  with  
 276 turning ratios ranging again between  $\alpha = [0.25, 0.75]$  with a mean at 0.5. We  
 277 then evaluate the CTM ground truth, the nVT, the FS, and the LS approaches  
 278 to derive the hypernetwork, and the nVT and QP approaches to approximate  
 279 the network jam density  $K_{max}$ . Moreover, the state-of-the-art methods are  
 280 applied. We estimate the free-flow branch only for the set  $\mathcal{C}$ , as we have shown  
 281 in the previous section that the impact of this assumption is minor.

282 As the proposed methodology primarily focuses on improving the estimation  
 283 of the maximum flows  $\tilde{q}$  and thus the network-wide capacity  $Q_{max}$ , as well as  
 284 the jam density  $K_{max}$ , we merely compare the corresponding results. This  
 285 allows us to drastically reduce the scenarios to be run with the CTM. The  
 286 results from the CTM simulation lead to varying  $Q_{max}$  and  $K_{max}$  for each  
 287 scenario as illustrated in Figure 4. A range of about 200 veh/h for  $Q_{max}$  can be  
 288 observed. The values of  $K_{max}$  cover a range of nearly 25 veh/km. The significant  
 289 variability in these results shows that the MFD indeed depends on the spatial  
 290 demand pattern in the network. This further indicates that a framework to  
 291 estimate the MFD for specific spatial demand patterns is beneficial. Despite  
 292 the assumption regarding the existence of stationary states, which might be  
 violated in reality, the approximated MFDs can be useful.

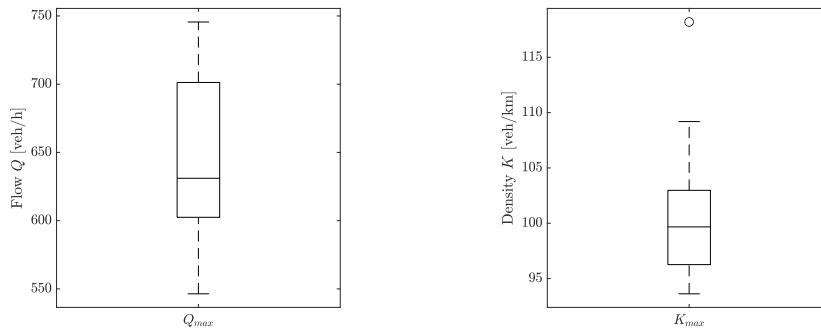

a)  $Q_{max}$  from CTM simulations with varying turning ratios.

b)  $K_{max}$  from CTM simulations with varying turning ratios.

Figure 4: Boxplots showing the variability of  $Q_{max}$  and  $K_{max}$  across the evaluated scenarios.

293 To further assess the nMC, we calculate the absolute relative differences  
 294  $\Delta K_{max}$  and  $\Delta Q_{max}$  for the MFD estimations from both the proposed framework  
 295 and the state of the art, compared to the ground truth. For example, the  
 296 absolute relative difference  $\Delta Q_{max}$  between the nVT approach and the CTM  
 297 can be calculated as  $\Delta Q_{max} = \left| \frac{Q_{max,nVT} - Q_{max,CTM}}{Q_{max,CTM}} \right|$ . Analogous calculations  
 298 are performed to derive the other absolute relative differences. Note that  $Q_{max}$   
 299 and  $K_{max}$  for all state-of-the-art methods remain invariant across the scenarios  
 300

301 since they do not account for turning ratios.

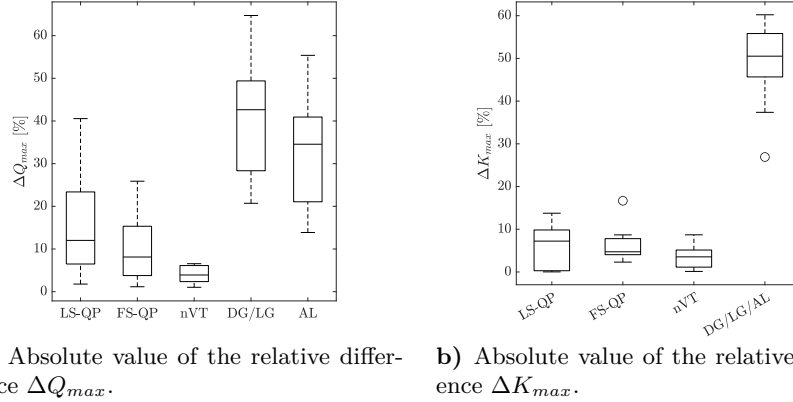

Figure 5: Analysis of the estimated network-wide capacity  $Q_{max}$  and jam density  $K_{max}$ . The evaluated approaches are the proposed framework, i.e., LS-QP, FS-QP, and nVT, as well as the state of the art, i.e., DG, LC, and AL.

302 Figure 5 summarizes the results. Figure 5a shows the difference in the capacity  
303 estimation from the proposed LS-QP, the FS-QP, the nVT approach,  
304 and the state of the art compared to the ground truth values. The differences  
305 of the methods ‘DG’ and ‘LG’ do not vary since their estimated capacity is  
306 equal. The figure clearly shows the substantial improvement in the estimation  
307 accuracy regarding the network-wide capacity of all three proposed methods.  
308 Moreover, it is apparent that the FS-QP approach, which models network-wide  
309 spillback propagation in more detail, is more exact than the LS-QP approach,  
310 which does not account for such effects. Furthermore, the nVT approach is even  
311 more precise in estimating the network-wide capacity. The average capacity estimation  
312 of the proposed approaches is more than five times as accurate as the estimate  
313 by the state of the art. Additionally, we investigate the estimation of  
314 the network-wide maximum density  $K_{max}$  (see Figure 5b). While the average  
315 estimation of  $K_{max}$  by the nVT approach seems to be more accurate than the  
316 one by both approximate approaches, the differences are less obvious. Again,  
317 the proposed methods substantially improve the estimation of  $K_{max}$  compared  
318 to the state of the art, which assumes the jam density equal to the one of the  
319 link FD, i.e.,  $K_{max} = \kappa_{max}$ . On average, the estimated  $K_{max}$  is more than five  
320 times closer to the ground truth value than the estimate from the state of the  
321 art.

322 The analysis above showed that our proposed framework has reasonable accuracy.  
323 This lets us conduct analyses that are not possible with other methods,  
324 such as the CTM, due to their high computational cost. To showcase this, we  
325 further examine the robustness of the estimated MFD with regard to small deviations  
326 of the turning ratios. To analyze the effect of small deviations of turning

327 ratios, we first define a reference set  $\mathcal{A}$  and then introduce random variations  
 328 with a maximum of  $\pm 5\%$  relative turning flows. We sample 100 sets with dif-  
 329 ferent variations and evaluate the MFD for each of them based on the FS-QP  
 330 approach. The results are displayed in Figure 6 as boxplots for  $Q_{max}$  and  $K_{max}$ ,  
 including the relative differences to values referring to the reference set  $\mathcal{A}$ . The

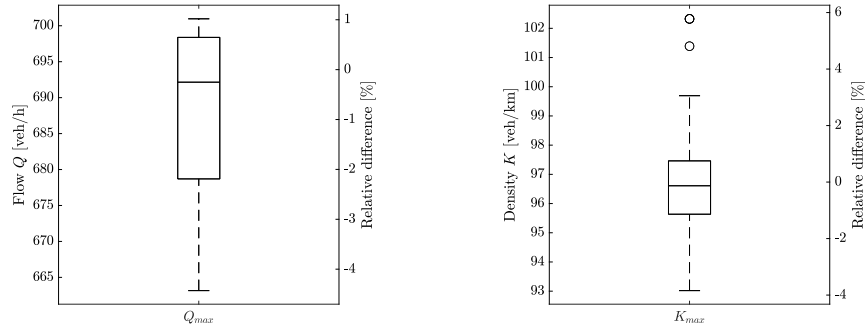

a)  $Q_{max}$  from FS-QP-based MFD estimation with varying turning ratios.      b)  $K_{max}$  from FS-QP-based MFD estimation with varying turning ratios.

Figure 6: Variability of  $Q_{max}$  and  $K_{max}$  for the evaluated scenarios with small deviations of turning ratios.

331 values of the capacity  $Q_{max}$  lie in a range of about 40 veh/h. Compared to the  
 332 results displayed in Figure 4 which correspond to a strong variation of turning  
 333 ratios, this is clearly a small range of variation. This is further highlighted by the  
 334 relative differences which are below 4%. However, it is apparent that the capacity  
 335 of the estimated MFD is sensitive to turning ratios. Fortunately, due to the  
 336 low computational cost of the proposed approach, one can increase the robustness  
 337 of the results by simply introducing small deviations in the turning ratios  
 338 and then taking the average capacity  $Q_{max}$ . Regarding the network-wide jam  
 339 density, the absolute variation lies in a range of 5 veh/km. Considering that the  
 340 relative differences are also below 4%, except for two outliers, the sensitivity of  
 341 the network jam density is similar to the capacity. Nevertheless, the robustness  
 342 can also be increased by taking the average from an array of estimated values.  
 343 These results can indicate how often the MFD has to be estimated during the  
 344 day. More specifically, evaluating our proposed framework for specific turning  
 345 ratios enables one to quantify how small deviations in the turning ratios affect  
 346 the MFD. Thereby, one can identify the maximum variation of turning ratios for  
 347 a specific intersection, or multiple ones, that corresponds to a given admissible  
 348 variation of the MFD. This, in turn, allows one to identify the times of the day  
 349 when the MFD has to be re-estimated to reflect variations in the turning ratios.  
 350 This example further confirms that spatial demand patterns indeed impact the  
 351 MFD and highlights the value the proposed framework provides for the analysis  
 352 of urban traffic.  
 353

## References

- 354
- 355 Daganzo CF, 2005a *A variational formulation of kinematic waves: basic theory and*  
356 *complex boundary conditions. Transportation Research Part B: Methodological*  
357 *39(2):187–196.*
- 358 Daganzo CF, 2005b *A variational formulation of kinematic waves: Solution methods.*  
359 *Transportation Research Part B: Methodological 39(10):934–950.*
- 360 Daganzo CF, 2007 *Urban gridlock: Macroscopic modeling and mitigation approaches.*  
361 *Transportation Research Part B: Methodological 41(1):49–62.*
- 362 Daganzo CF, Geroliminis N, 2008 *An analytical approximation for the macroscopic*  
363 *fundamental diagram of urban traffic. Transportation Research Part B: Method-*  
364 *ological (42):771–781.*
- 365 Daganzo CF, Lehe LJ, 2016 *Traffic flow on signalized streets. Transportation Research*  
366 *Part B: Methodological 90:56–69.*
- 367 Daganzo CF, Menendez M, 2005 *A variational formulation of kinematic waves: Bottle-*  
368 *neck properties and examples. Proceedings of the 16th International Symposium*  
369 *on Transportation and Traffic Theory, 345–364 (Maryland: Elsevier).*
- 370 Dakic I, Ambühl L, Schümperlin O, Menendez M, 2020 *On the modeling of passenger*  
371 *mobility for stochastic bi-modal urban corridors. Transportation Research Part*  
372 *C: Emerging Technologies 113(November 2018):146–163.*
- 373 Herz R, Schlichter G, Siegener W, 1976 *Angewandte statistik für verkehrs- und regional-*  
374 *planer. Verkehrs-und Regionalplaner, Werner-Ingenieur-Texte 42, Werner-*  
375 *Verlag, Düsseldorf 131.*
- 376 Jin WL, Gan QJ, Gayah VV, 2013 *A kinematic wave approach to traffic statics and*  
377 *dynamics in a double-ring network. Transportation Research Part B: Method-*  
378 *ological 57:114–131.*
- 379 Laval JA, Castrillón F, 2015 *Stochastic approximations for the macroscopic fundamen-*  
380 *tal diagram of urban networks. Transportation Research Part B: Methodological*  
381 *81:904–916.*
- 382 Laval JA, Chilukuri BR, 2016 *Symmetries in the kinematic wave model and a*  
383 *parameter-free representation of traffic flow. Transportation Research Part B:*  
384 *Methodological 89:168–177.*
- 385 Leblanc LJ, 1975 *An algorithm for the discrete network design problem. Transportation*  
386 *Science 9(3):183–199.*
- 387 Leclercq L, Geroliminis N, 2013 *Estimating mfd in simple networks with route choice.*  
388 *Transportation Research Part B: Methodological 57:468–484.*
- 389 Leclercq L, Paipuri M, 2019 *Macroscopic Traffic Dynamics Under Fast-Varying De-*  
390 *mand. Transportation Science 53(6):1526–1545.*
- 391 Newell GF, 1993 *A simplified theory of kinematic waves in highway traffic, part i: Gen-*  
392 *eral theory, part ii: Queueing at freeway bottlenecks, part iii: Multi-destination*  
393 *flows. Transportation Research Part B: Methodological 27(4):281–313.*
- 394 Tilg G, Ambühl L, Batista SF, Menendez M, Busch F, 2021 *On the application of*  
395 *variational theory to urban networks. Transportation Research Part B: Method-*  
396 *ological 150:435–456.*
